# Supplementary material for: Urine-derived bladder cancer organoids (urinoids) as a tool for cancer longitudinal response monitoring and therapy adaptation
Source: PubMed Central journal article supplement (PMC10844626; doi:10.1038/s41416-023-02494-6), 2023-12-15
Supplement: 41416_2023_2494_MOESM1_ESM.pdf [file 41416_2023_2494_MOESM1_ESM.pdf]

**Supplemental Figure 1. Immunohistochemical controls of bladder urinoids.**

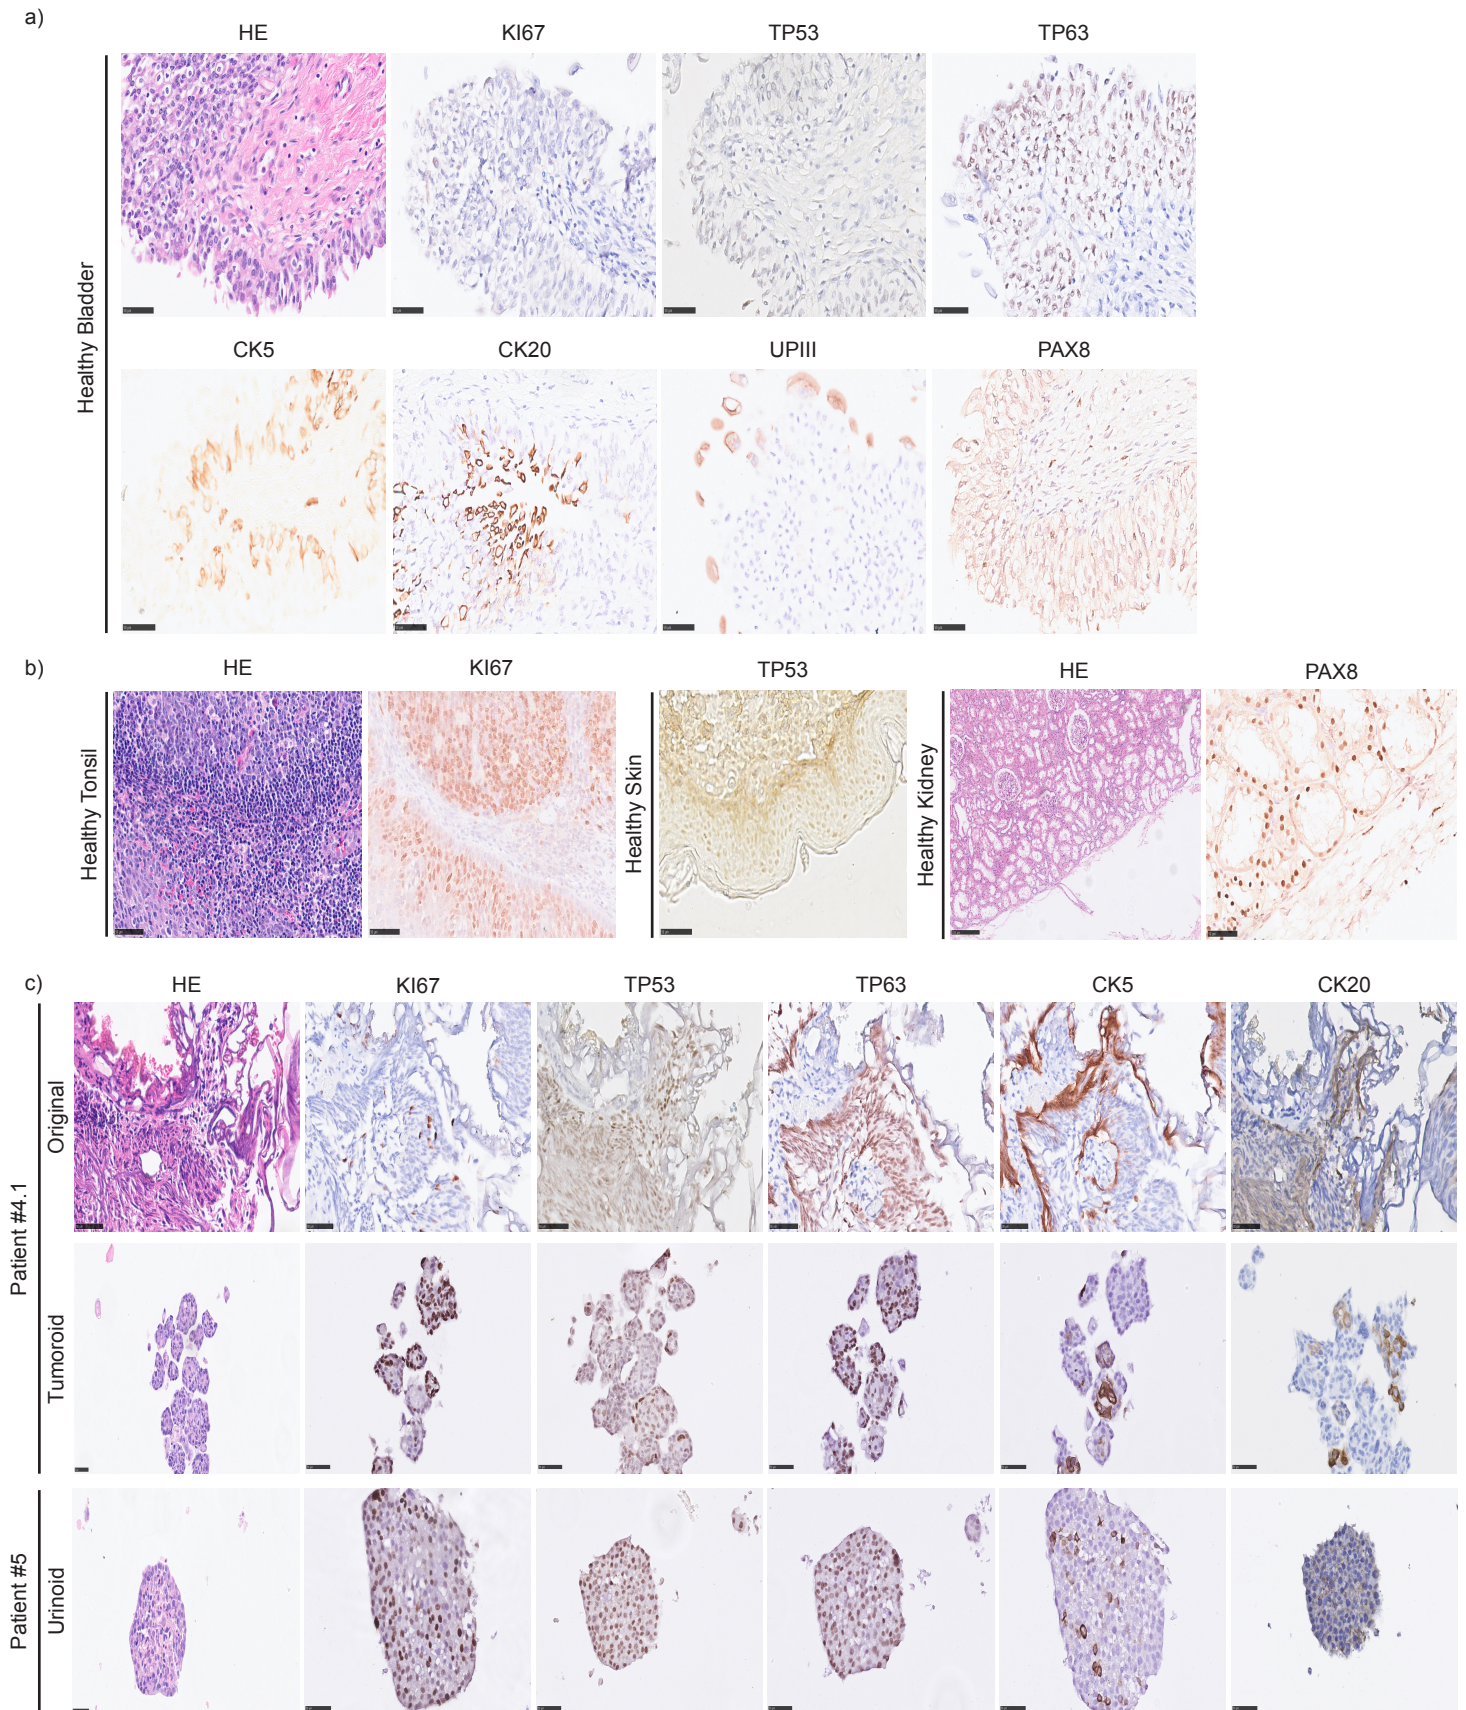

**Supplemental Figure 1. Immunohistochemical controls of bladder urinoids.**

Immunohistochemical analysis of (a) healthy bladder tissue displayed with hematoxylin and eosin (HE) and their expression of KI67, TP53, TP63, Keratin 5 (CK5), Keratin 20 (CK20), Uroplakin 3a (UPIII) & PAX8. (b) Positive control stainings for KI67, TP53 & PAX8 in Tonsil, Skin and Kidney tissue. (c) Immunohistochemical analysis of tumoroid 4.1 & UBTOR5 displayed with HE and the expression of KI67, TP53, TP63, Keratin 5 (CK5) & Keratin 20 (CK20). Scale bars are 50  $\mu$ m for tissues and organoids slides.



Supplemental Figure 2. Immunohistochemical analysis of UKP111 and PAX8.

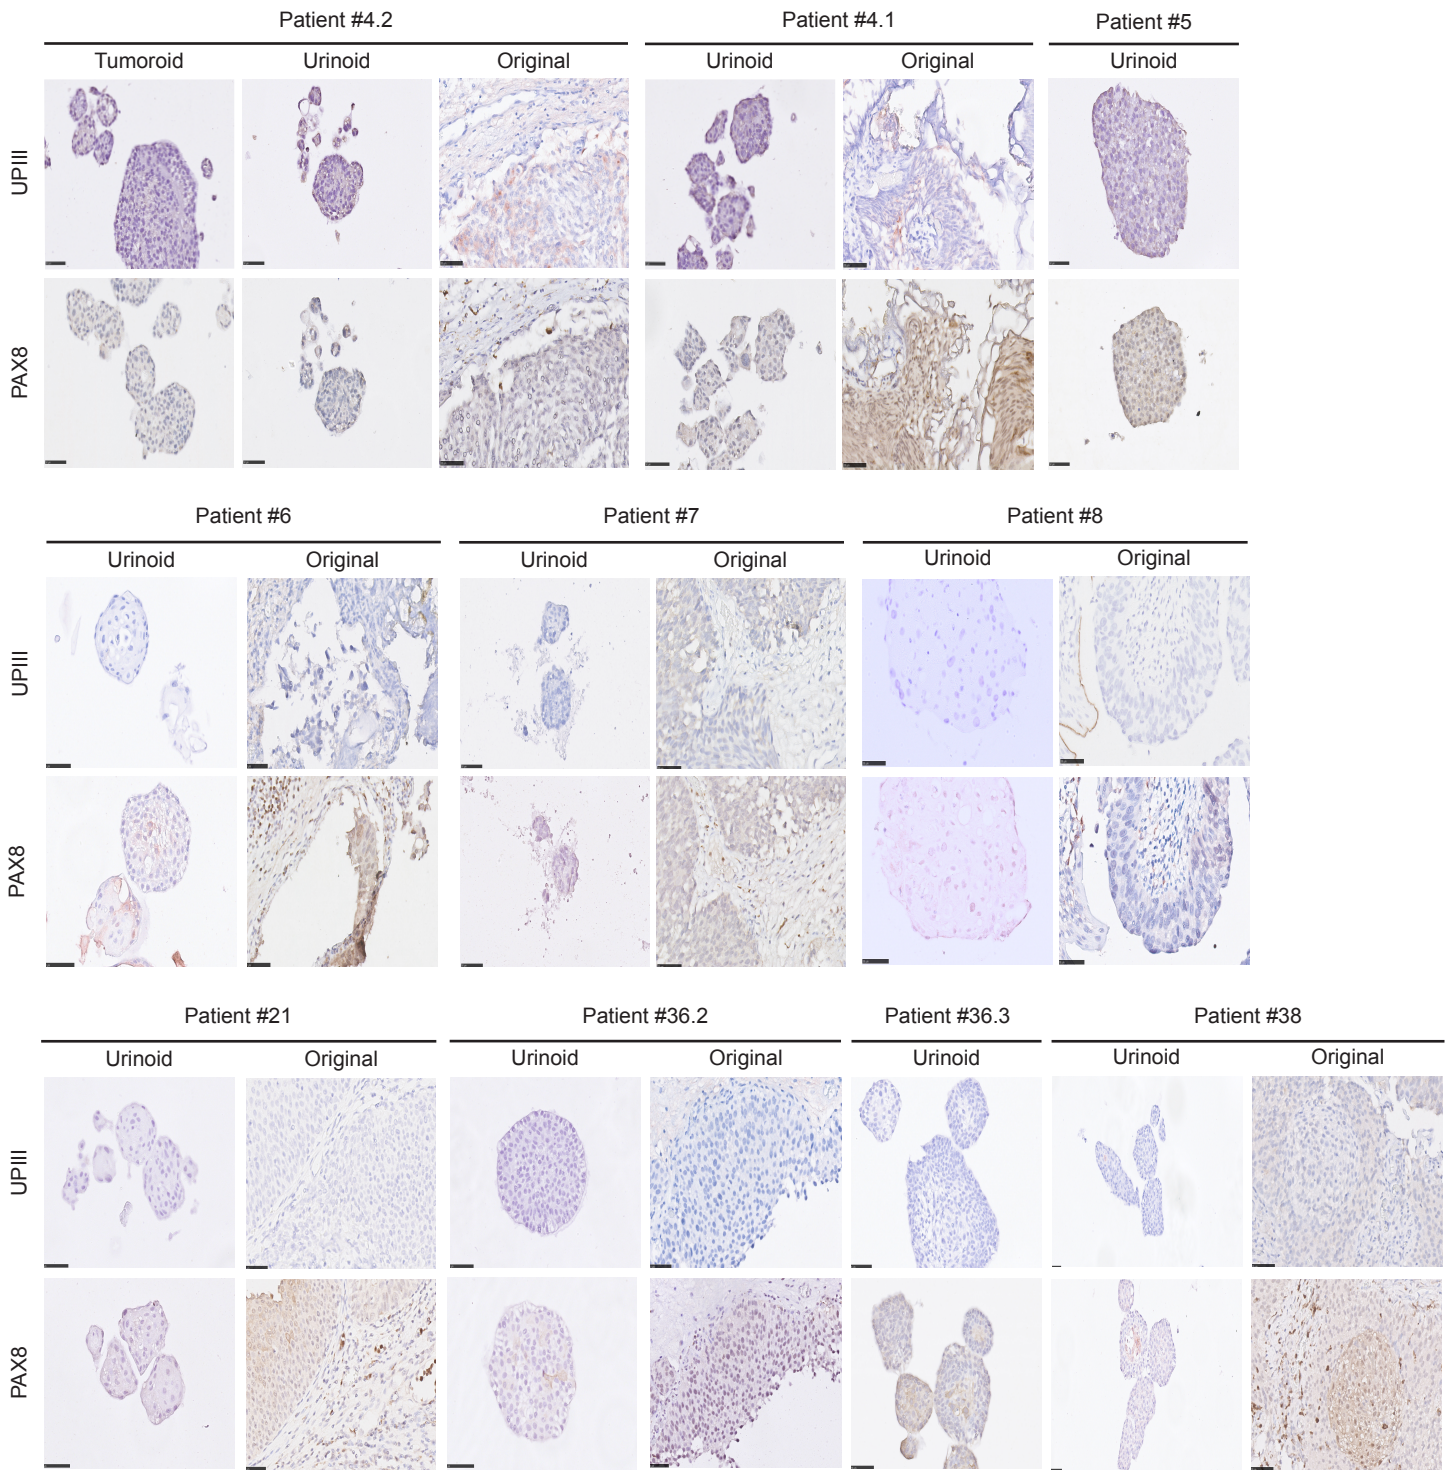

**Supplemental Figure 2. Immunohistochemical analysis of UPIII and PAX8.**

Immunohistochemical analysis of Original tumor tissues, urinoids and tumoroids displayed with their expression of Uroplakin 3a (UPIII) & PAX8. Scale bars are 50 μm for tissues and organoids slides.

**Supplemental Figure 3. Whole genome sequencing of patient 4 urinoids & tumoroids.**

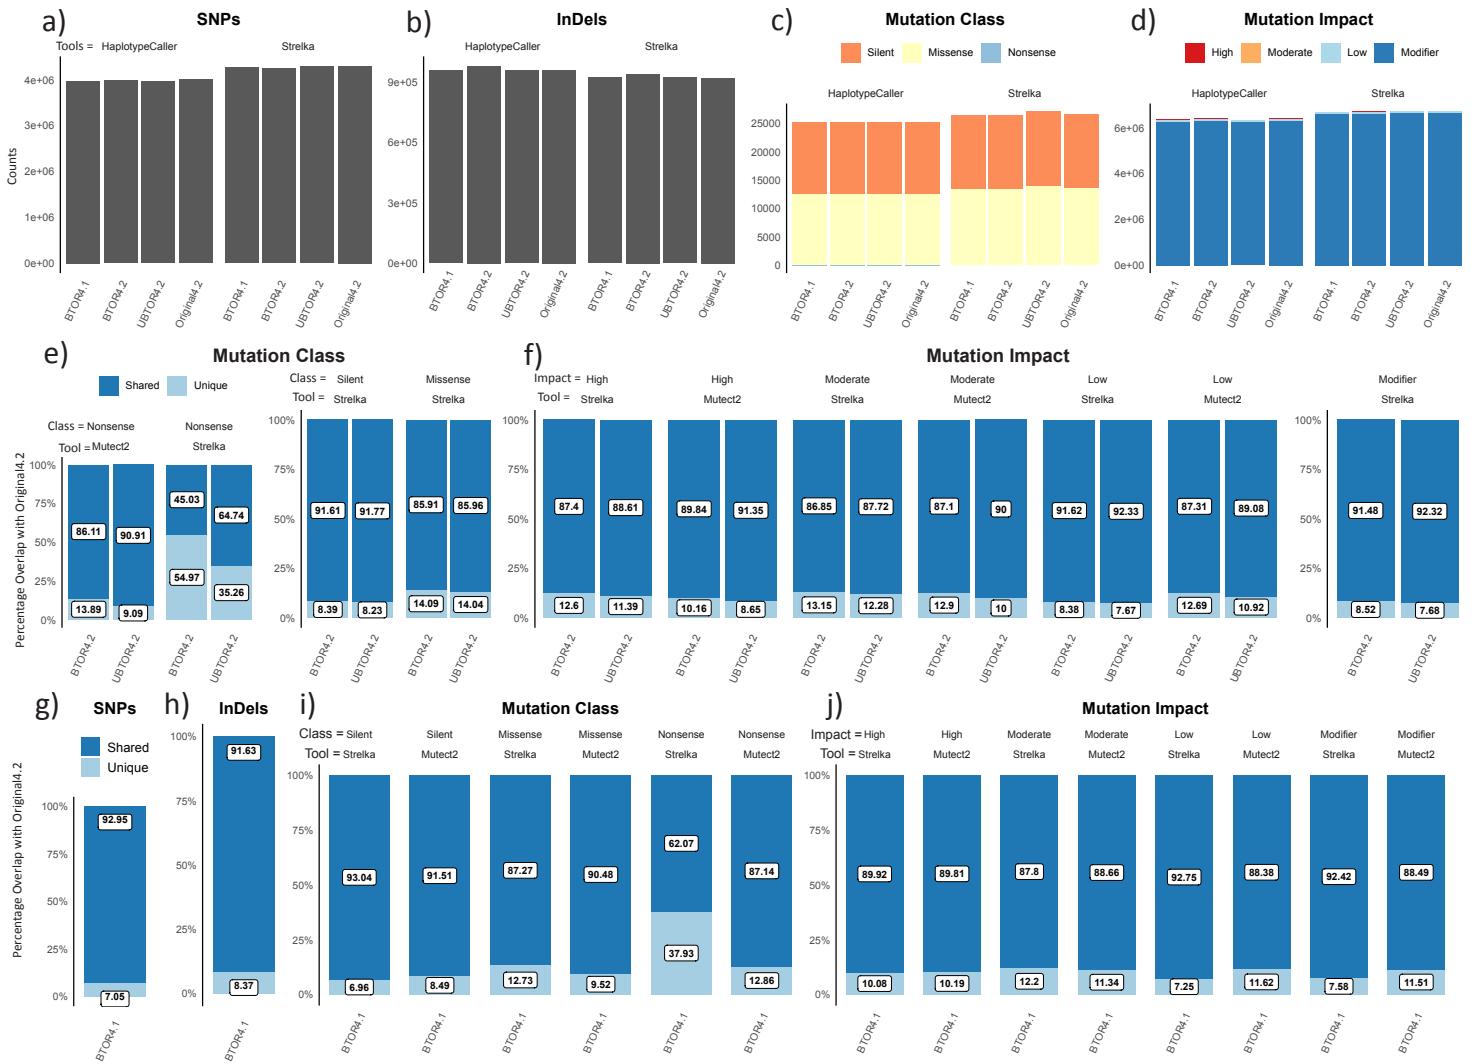

**Supplemental Figure 3. Whole genome sequencing analysis of patient 4 urinoids & Tumoroids.** Count of all patient 4 samples for (a) SNPs, (b) InDels, (c) Mutation class and (d) Mutation impact from the Sarek pipeline. Organoid correlation of mutations with the Original 4.2 sample for (e) nonsense (Mutect2 tool), silent and missense (Strelka tool) of mutation class and (f) high, moderate, low (Mutect2 & Strelka tools) and modifier (Strelka tool) impact of mutations for urinoids UBTOR4.2 and tumoroid BTOR4.2. Pre-treatment tumoroid BTOR4.1 correlation of mutations with the original 4.2 sample for (g) SNPs, (h) InDels, (i) mutation class and (j) mutation impact of Mutect2 and Strelka tools from the Sarek pipeline.

Supplemental Figure 4. Karyosequencing Patient 4.

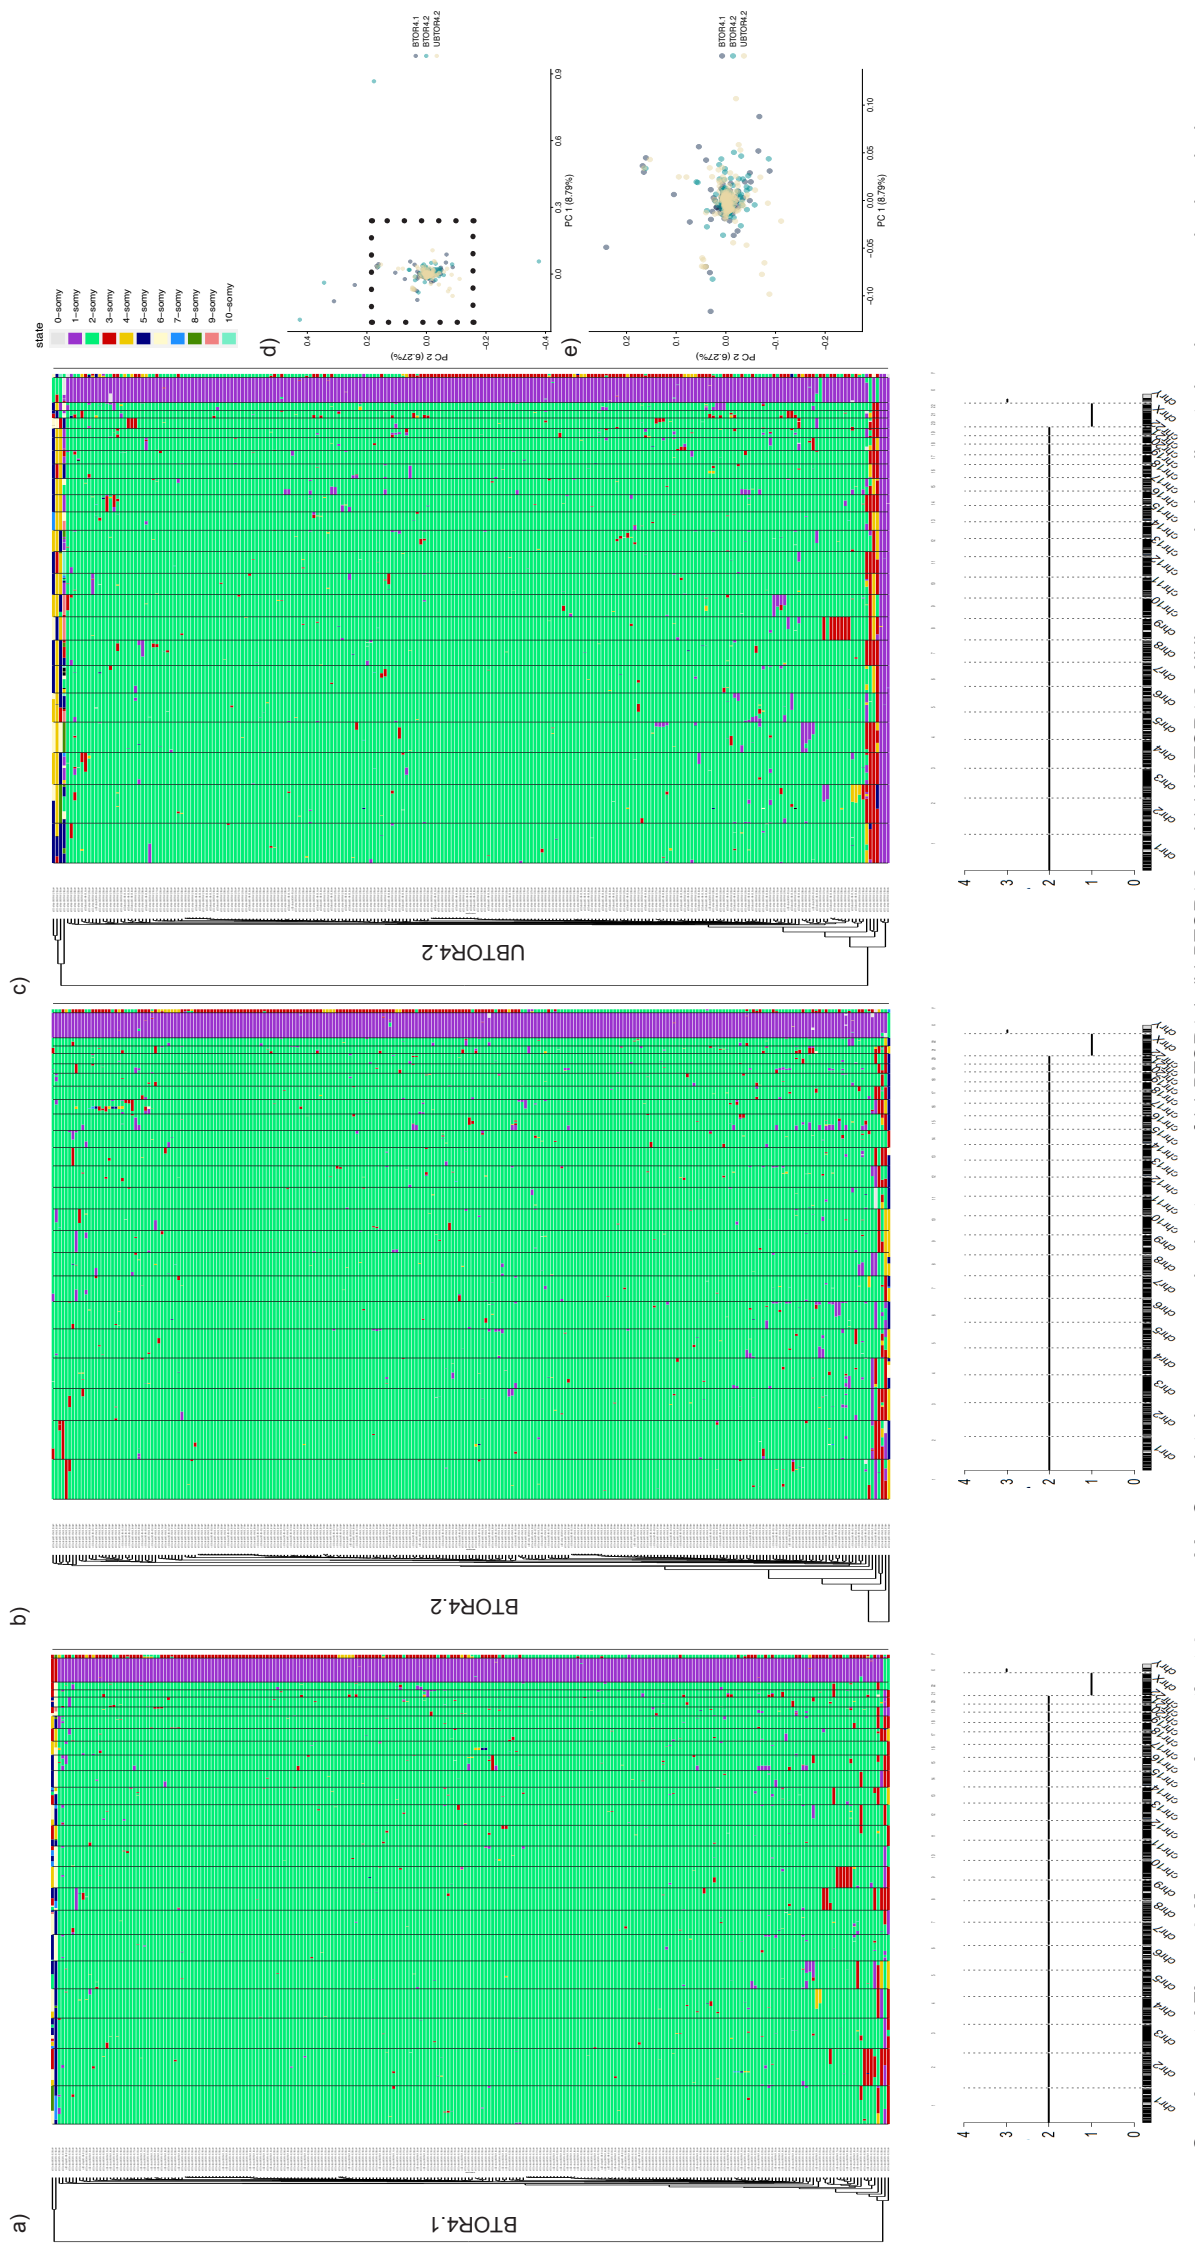

**Supplemental Figure 4. Karyosequencing patient 4 organoids.** Complete karyo-sequencing heatmaps of (a) BTOR4.1, (b) BTOR4.2 and (c) UBTOR4.2. All lines were single cell sorted and sequenced using single cell karyo-sequencing. Single cell data was analyzed using AneuFinder referenced to Genome Reference Consortium Human Build 38 from NCBI. Consensus ploidy plots of BTOR4.1, UBTOR4.2 and BTOR4.2 of patient four displayed in supplemental figure 5. (d) Principle component analysis of BTOR4.1, BTOR4.2 & UBTOR4.2 with (e) zoom of the densest region as indicated by the dashed box in.



**Supplemental Figure 5. Immunotherapy induced structural variations in Tumoroids & Urinoids of Patient 4.**

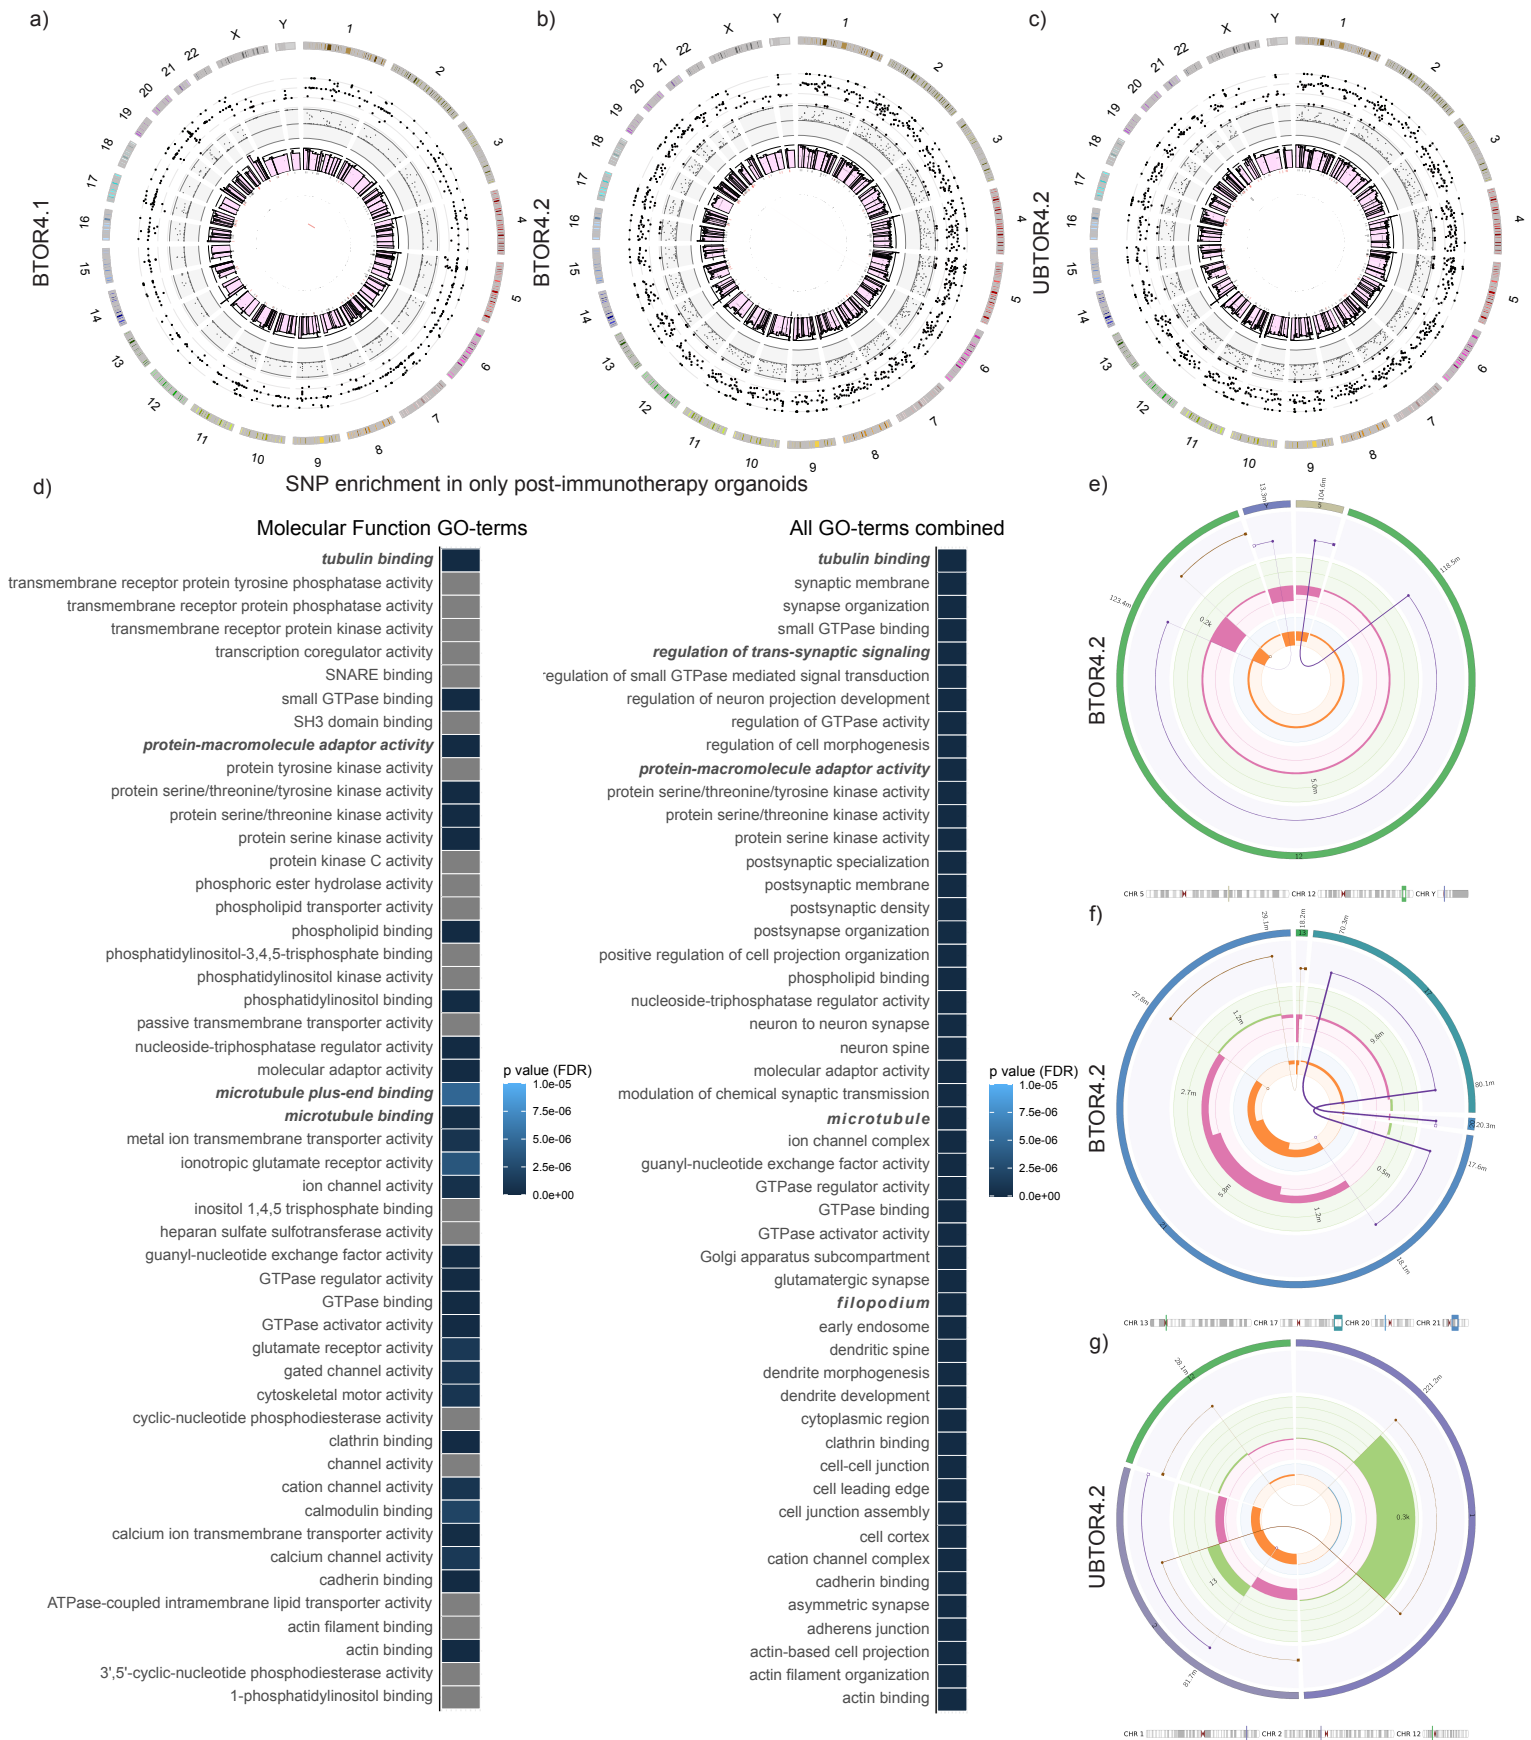

**Supplemental Figure 5. Immunotherapy induced structural variations in tumoroids & urinoids of patient 4.** Patient 4 circos overview plots from GRIDSS-PURPLE-LINX analysis with from the outside inwards the respective copy number variations (CNV), B-allele frequency (BAF), GC content and structural variations (SVs) interchromosomal (black) and intrachromosomal (red) variation of (a) BTOR4.1 tracks of pre-treatment tumoroid BTOR4.1 and post-treatment (b) tumoroid BTOR4.2 and (c) urinoid UBTOR4.2. (d) Highest quality scoring SNP enrichment terms (n=50) of SNPs only found in post-treatment organoids affecting genes associated with GO terms of Molecular Function (MF, left) and all Go terms (right), significance using false discovery rate (p<0.05) with bold highlighted terms are associated with microtubules. Complex multichromosomal linked structural variations as found by the LINX analysis of the GRIDSS-PURPLE-LINX pipeline for tumoroid (e) BTOR4.2 on chromosomes 5, 12 & Y, (f) chromosomes 13, 17, 20 & 21 and (g) urinoid UBTOR4.2 on chromosomes 1, 2 & 12.

Supplemental Figure 6. Application of urinoids in bladder cancer patients drug stratification.

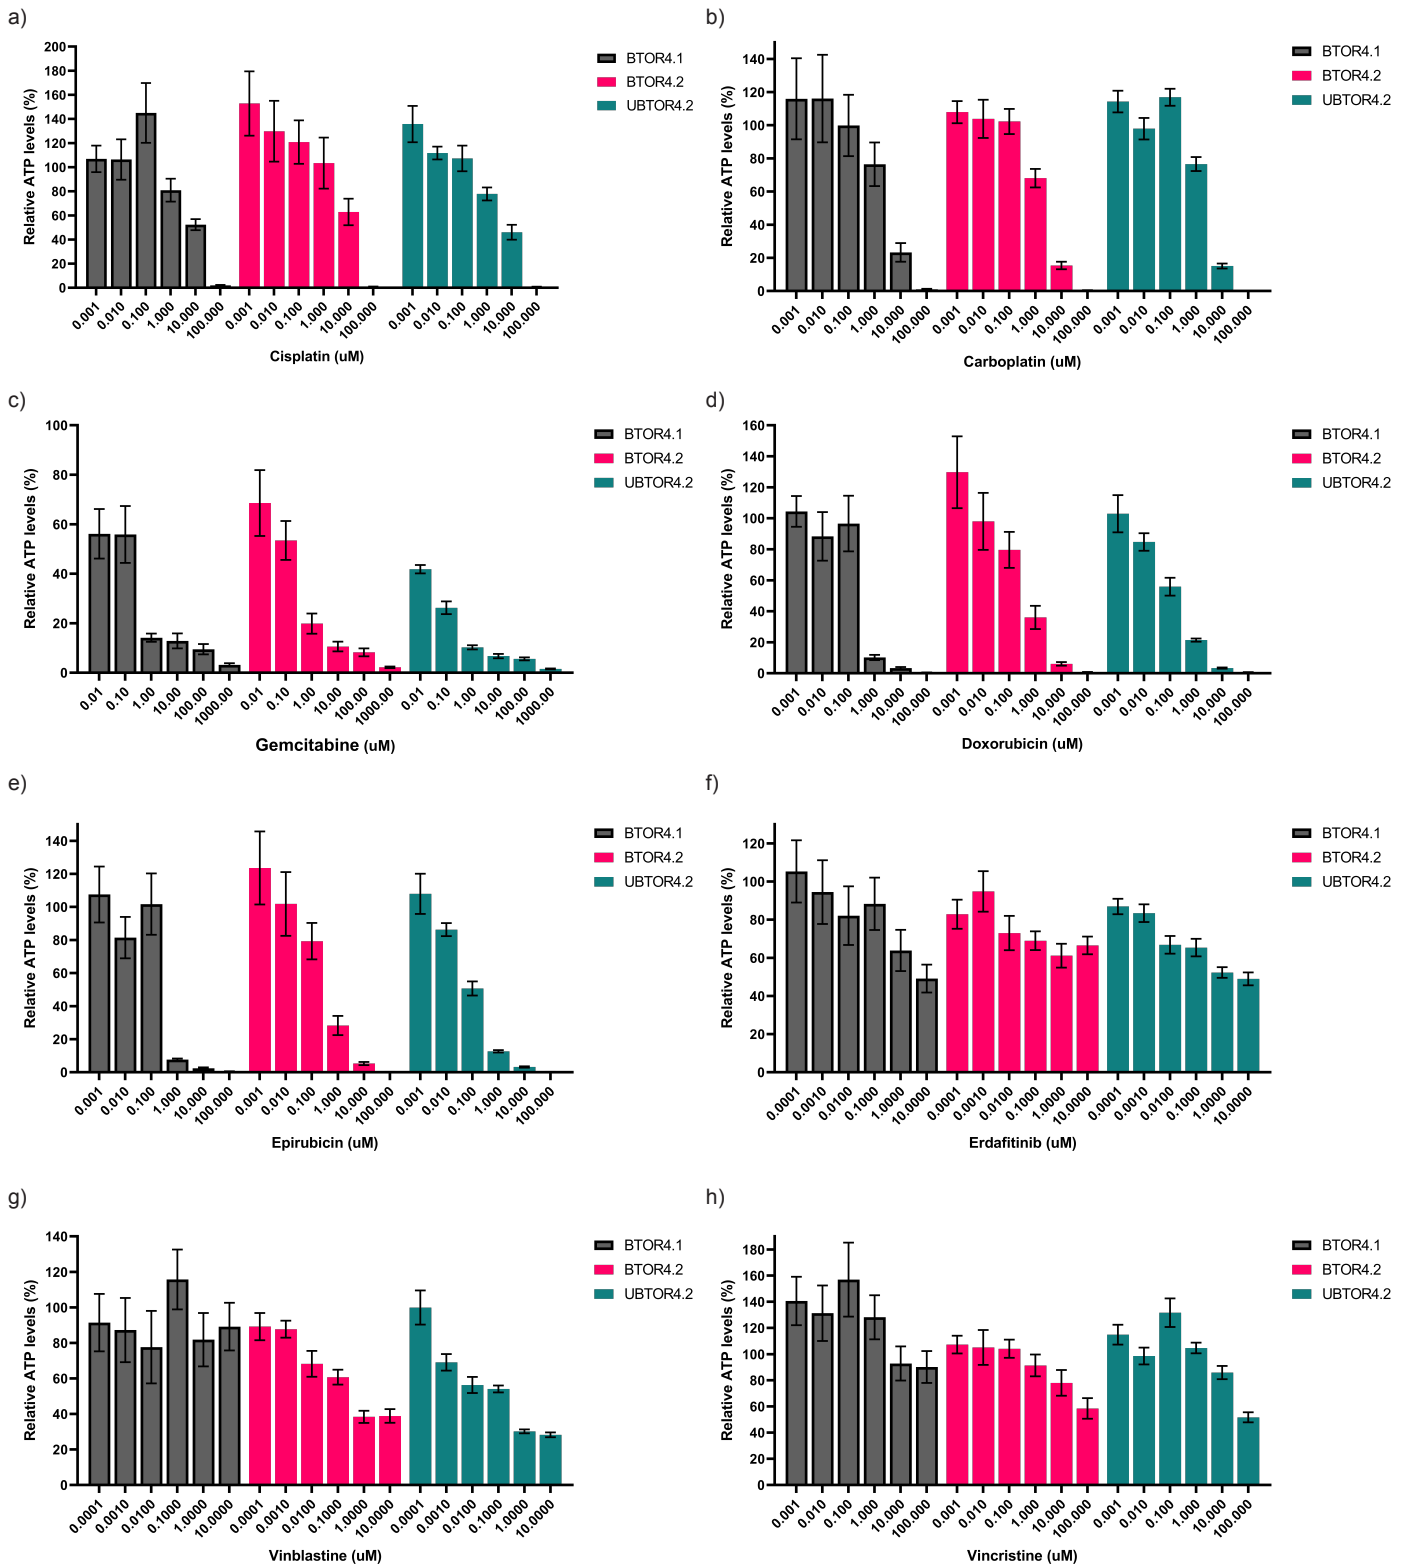

Supplemental Figure 6. Application of urinoids in bladder cancer patients drug stratification. Displayed are the relative ATP levels across a panel of common bladder cancer treatments for organoids BTOR4.1, BTOR4.2 & UBTOR4.2 for (a) Cisplatin, (b) Carboplatin, (c) Gemcitabine, (d) Doxorubicin, (e) Epirubicin, (f) Erdafitinib, (g) Vinblastine and (h) Vincristine. Displayed are the results of n = 6 replicates per drug concentration, consisting of 3 biological and 2 technical replicates with their respective s.e.m. deviation, normalized to no drug control condition (n = 6 per drug).



**Supplemental Table 1. Summary of all patients included for patient-derived urinoid line establishment and corresponding clinical data**

| Patient # | Line      | Classification | Subclassification      | Gender | Age | Successful Establishment |
|-----------|-----------|----------------|------------------------|--------|-----|--------------------------|
| 4         | UBTOR4.2  | MIBC           | ypT1G3 papillary UCC   | M      | 65  | Yes                      |
| 5         | UBTOR5    | MIBC           | TisN0MxR0              | F      | 67  | Yes                      |
| 6         | UBTOR6.1  | NMIBC          | pT1G3 papillary UCC    | F      | 71  | Yes                      |
| 6         | UBTOR6.2  | NMIBC          | pT1G3 papillary UCC    | F      | 71  | No                       |
| 7         | UBTOR7.1  | NMIBC          | pT1G3                  | M      | 73  | Yes                      |
| 8         | UBTOR8    | MIBC           | pTisN0MxR0             | M      | 58  | Yes                      |
| 9         | UBTOR9    | MIBC           | pTisN0MxR0             | M      | 76  | No                       |
| 15        | UBTOR15   | NMIBC          | pT1G3                  | M      | 71  | No                       |
| 21        | UBTOR21   | MIBC           | pT3N0MxR0 + SCC + PI   | M      | 75  | Yes                      |
| 32        | UBTOR32   | NMIBC          | pTaG1                  | M      | 75  | No                       |
| 36        | UBTOR36.2 | NMIBC          | pT1G2-3                | M      | 62  | Yes                      |
| 36        | UBTOR36.3 | NMIBC          | pT1G2-3                | M      | 62  | Yes                      |
| 38        | UBTOR38   | NMIBC          | pTaG1-2                | M      | 70  | Yes                      |
| 40        | UBTOR40   | MIBC           | pT0N0                  | M      | 69  | No                       |
| 41        | UBTOR41   | MIBC           | pT2bN0 UCC             | M      | 74  | Yes                      |
| 42        | UBTOR42   | NMIBC          | pTaG1                  | M      | 76  | No                       |
| 43        | UBTOR43   | NMIBC          | pTisN0MxR0             | M      | 68  | No                       |
| 44        | UBTOR44   | MIBC           | pT0N0                  | M      | 72  | No                       |
| 45        | UBTOR45   | MIBC           | pT2G3 UCC              | M      | 60  | Yes                      |
| 50        | UBTOR50   | MIBC           | cT3N1M1-ycT3N0M0 + SCC | F      | 54  | No                       |
| 51        | UBTOR51   | MIBC           | pT3aN0MxR0 UCC         | F      | 75  | No                       |
| 52        | UBTOR52   | MIBC           | pT2G3 UCC              | F      | 69  | No                       |
| 54        | UBTOR54   | NMIBC          | pT0N0                  | M      | 76  | No                       |
| 57        | UBTOR57   | NMIBC          | pT1G3 Papillary UCC    | M      | 71  | Yes                      |
| 61        | UBTOR61   | NMIBC          | pTisN0MxR0             | M      | 74  | No                       |

Subclassification given based on TNM classification and pathologist report

UCC = Urothelial carcinoma; SCC = Squamous cell carcinoma; PI = Peritoneal invasion

**Supplemental Table 2. Summary immunohistochemical results original tumor tissues and organoid**

| <b>Patient #</b> | <b>Original / Line</b>                          | <b>Molecular subtype estimation</b>                                                                                          |
|------------------|-------------------------------------------------|------------------------------------------------------------------------------------------------------------------------------|
| 4                | Original Tumor Tissue<br>UBTOR4.2               | Transitional / Intermediate & luminal / luminal-like subtype<br>Transitional / Intermediate & luminal / luminal-like subtype |
| 5                | Original Tumor Tissue<br>UBTOR5                 | n.a.<br>Transitional / Intermediate & luminal / luminal-like subtype                                                         |
| 6                | Original Tumor Tissue<br>UBTOR6.1               | Basal / Basal-like subtype<br>Basal / Basal-like subtype                                                                     |
| 7                | Original Tumor Tissue<br>UBTOR7.1               | Basal / Basal-like subtype<br>Basal / Basal-like subtype                                                                     |
| 8                | Original Tumor Tissue<br>UBTOR8                 | Transitional / Intermediate & luminal / luminal-like subtype<br>Transitional / Intermediate & luminal / luminal-like subtype |
| 21               | Original Tumor Tissue<br>UBTOR21                | Basal / Basal-like subtype<br>Basal / Basal-like subtype                                                                     |
| 36               | Original Tumor Tissue<br>UBTOR36.2<br>UBTOR36.3 | Basal / Basal-like subtype<br>Basal / Basal-like subtype<br>Basal / Basal-like subtype                                       |
| 38               | Original Tumor Tissue<br>UBTOR38                | Basal / Basal-like subtype<br>Basal / Basal-like subtype                                                                     |
| 41               | Original Tumor Tissue<br>UBTOR41                | Basal / Basal-like subtype<br>Basal / Basal-like subtype                                                                     |
| 45               | Original Tumor Tissue<br>UBTOR45                | Basal / Basal-like subtype<br>Basal / Basal-like subtype                                                                     |
| 57               | Original Tumor Tissue<br>UBTOR57                | Basal / Basal-like subtype<br>Basal / Basal-like subtype                                                                     |

Molecular subtypes are estimated on the current consensus classifications; CytoKeratin 5 (CK5) positive samples = luminal or luminal-like subtype, CytoKeratin 20 (CK20) positive samples = basal or basal-like subtype, tumor protein 63 (TP63) positive samples = intermediate subtype. Original tumor sample patient 5 was lost due to a clerical error at the pathology, thus not available for analysis.



Supplemental Table 3. Fusion proteins of BTOR4.1, BTOR4.2 and UBTOR4.2 detected by Manta

| Organoid Line | Fusion Gene Name | ReportedType | Phased        | GeneStart  | GeneContextStart | TranscriptStart | GeneEnd | GeneContextEnd  | TranscriptEnd   |
|---------------|------------------|--------------|---------------|------------|------------------|-----------------|---------|-----------------|-----------------|
| BTOR4.1       | NUGGC_SCARA5     | NONE         | INFRAME       | NUGGC      | Exon 18          | ENST00000413272 | SCARA5  | Promoter Region | ENST00000518030 |
| BTOR4.1       | CHD7_ZC3H12A     | NONE         | INFRAME       | CHD7       | Exon 2           | ENST00000423902 | ZC3H12A | Promoter Region | ENST00000471012 |
| BTOR4.1       | POLRMT_SYPL1     | NONE         | SKIPPED_EXONS | POLRMT     | Exon 1           | ENST00000592863 | SYPL1   | Exon 6          | ENST00000470347 |
| BTOR4.1       | EXT2_SYPL1       | NONE         | SKIPPED_EXONS | EXT2       | Exon 11          | ENST00000533608 | SYPL1   | Exon 3          | ENST00000011473 |
| BTOR4.1       | SPTBN1_SPTBN1    | NONE         | OUT_OF_FRAME  | SPTBN1     | Exon 2           | ENST00000356805 | SPTBN1  | Exon 4          | ENST00000356805 |
| BTOR4.1       | BTG3_TBC1D16     | NONE         | INFRAME       | BTG3       | Exon 4           | ENST00000339775 | TBC1D16 | Promoter Region | ENST00000574241 |
| BTOR4.1       | KMT2D_KMT2D      | NONE         | OUT_OF_FRAME  | KMT2D      | Exon 11          | ENST00000301067 | KMT2D   | Exon 11         | ENST00000301067 |
| BTOR4.1       | PHACTR4_PHACTR4  | NONE         | OUT_OF_FRAME  | PHACTR4    | Exon 3           | ENST00000632421 | PHACTR4 | Exon 2          | ENST00000632421 |
| BTOR4.1       | NINL_NINL        | NONE         | INFRAME       | NINL       | Exon 17          | ENST00000278886 | NINL    | Exon 17         | ENST00000278886 |
| BTOR4.1       | FGFR3_TACC3      | KNOWN_PAIR   | INFRAME       | FGFR3      | Exon 17          | ENST00000340107 | TACC3   | Exon 8          | ENST00000313288 |
| BTOR4.1       | AC113348.2_CLK4  | NONE         | SKIPPED_EXONS | AC113348.2 | Exon 4           | ENST00000638723 | CLK4    | Promoter Region | ENST00000316308 |
| BTOR4.2       | NUGGC_SCARA5     | NONE         | INFRAME       | NUGGC      | Exon 18          | ENST00000413272 | SCARA5  | Promoter Region | ENST00000518030 |
| BTOR4.2       | SPTBN1_SPTBN1    | NONE         | OUT_OF_FRAME  | SPTBN1     | Exon 2           | ENST00000356805 | SPTBN1  | Exon 4          | ENST00000356805 |
| BTOR4.2       | BTG3_TBC1D16     | NONE         | INFRAME       | BTG3       | Exon 4           | ENST00000339775 | TBC1D16 | Promoter Region | ENST00000574241 |
| BTOR4.2       | KMT2D_KMT2D      | NONE         | OUT_OF_FRAME  | KMT2D      | Exon 11          | ENST00000301067 | KMT2D   | Exon 11         | ENST00000301067 |
| BTOR4.2       | NINL_NINL        | NONE         | INFRAME       | NINL       | Exon 17          | ENST00000278886 | NINL    | Exon 17         | ENST00000278886 |
| BTOR4.2       | FGFR3_TACC3      | KNOWN_PAIR   | INFRAME       | FGFR3      | Exon 17          | ENST00000340107 | TACC3   | Exon 8          | ENST00000313288 |
| BTOR4.2       | ADGRB3_ADGRB3    | NONE         | OUT_OF_FRAME  | ADGRB3     | Exon 8           | ENST00000370598 | ADGRB3  | Exon 11         | ENST00000370598 |
| BTOR4.2       | AC113348.2_CLK4  | NONE         | SKIPPED_EXONS | AC113348.2 | Exon 4           | ENST00000638723 | CLK4    | Promoter Region | ENST00000316308 |
| UBTOR4.2      | NUGGC_SCARA5     | NONE         | INFRAME       | NUGGC      | Exon 18          | ENST00000413272 | SCARA5  | Promoter Region | ENST00000518030 |
| UBTOR4.2      | ZNF236_TRAF3     | NONE         | SKIPPED_EXONS | ZNF236     | Exon 30          | ENST00000543926 | TRAF3   | Exon 2          | ENST00000560371 |
| UBTOR4.2      | SPTBN1_SPTBN1    | NONE         | OUT_OF_FRAME  | SPTBN1     | Exon 2           | ENST00000356805 | SPTBN1  | Exon 4          | ENST00000356805 |
| UBTOR4.2      | ARFGAP3_ACYP2    | NONE         | SKIPPED_EXONS | ARFGAP3    | Exon 7           | ENST00000263245 | ACYP2   | Promoter Region | ENST00000406041 |
| UBTOR4.2      | KMT2D_KMT2D      | NONE         | OUT_OF_FRAME  | KMT2D      | Exon 11          | ENST00000301067 | KMT2D   | Exon 11         | ENST00000301067 |
| UBTOR4.2      | BTG3_TBC1D16     | NONE         | INFRAME       | BTG3       | Exon 4           | ENST00000339775 | TBC1D16 | Promoter Region | ENST00000574241 |
| UBTOR4.2      | PHACTR4_PHACTR4  | NONE         | OUT_OF_FRAME  | PHACTR4    | Exon 3           | ENST00000632421 | PHACTR4 | Exon 2          | ENST00000632421 |
| UBTOR4.2      | FGFR3_TACC3      | KNOWN_PAIR   | INFRAME       | FGFR3      | Exon 17          | ENST00000340107 | TACC3   | Exon 8          | ENST00000313288 |

All fusion proteins found in BTOR4.1, BTOR4.2 and UBTOR4.2 using Manta analysis. Known fusion pairs are indicated by KNOWN\_PAIR.
